# Supplementary material for: Copper(ii) curcumin complexes for endoplasmic reticulum targeted photocytotoxicity
Source: Royal Society of Chemistry journal article supplement (doi:10.1039/d2ra04813b), 2022-01-01
Supplement: d2ra04813b1.pdf [file d2ra04813b1.pdf]

## Supporting Information for

# Copper(II) Curcumin Complexes for Endoplasmic Reticulum Targeted Photocytotoxicity

Atrayee Banaspati,<sup>†</sup> Vanitha Ramu,<sup>b</sup> Md Kausar Raza,<sup>\*,‡</sup> and Tridib K. Goswami<sup>\*,†</sup>

<sup>†</sup>*Department of Chemistry, Gauhati University, Guwahati 781014, Assam, India*

<sup>‡</sup>*Department of Inorganic and Physical Chemistry, Indian Institute of Science, Bangalore  
560012, India*

\*Corresponding author. *E-mail address:* tridibgoswami05@gmail.com (T. K. Goswami);  
kausarraza91@gmail.com (M. K. Raza).

## **Table of Contents**

**Table S1.** Selected bond distances (Å) and bond angles ( $^{\circ}$ ) of [Cu(acac)(phen)(ClO<sub>4</sub>)] (**4**).

**Table S2.** Selected bond distances (Å) and bond angles ( $^{\circ}$ ) of [Cu(acac)(dpq)(ClO<sub>4</sub>)] (**5**).

**Table S3.** DNA and protein binding constants for the Complexes [Cu(Cur)(L)(ClO<sub>4</sub>)] (**1-3**) and [Cu(acac)(L)(ClO<sub>4</sub>)] (**4-6**) (L = phen, **1, 4**; dpq, **2, 5**; dppz, **3, 6**).

**Scheme S1.** Synthetic scheme for the complexes **1-3**.

**Scheme S2.** Synthetic scheme for the complexes **4-6**.

**Figures S1-S6.** ESI-MS spectra of complex **1-6** in methanol.

**Figures S7-S12.** IR spectra of the complexes **1-6** in solid KBr matrix.

**Figure S13.** The electronic spectra of the complexes **1-3** (a) and **4-6** (b) (1 mM) in DMF-Tris-HCl buffer (pH 7.2) (1:4 v/v).

**Figure S14.** Cyclic voltammograms of complexes **3-6** in DMF using TBAP (0.1 M) as the supporting electrolyte with a scan rate of 50 mV s<sup>-1</sup>.

**Figure S15.** Electronic absorption spectra of the complexes **1-3** (a-c) in DMSO-Tris-HCl buffer (pH 7.2) (1:4 v/v) at different time points showing the solution phase stability of the complexes.

**Figure S16.** Electronic absorption spectra of the complexes **1** (a), **2** (b) and **3** (c) in DMSO-Tris-HCl buffer (pH 7.2) (1:4 v/v) at different time points of exposure to visible light (400-700 nm).

**Figure S17.** The unit cell packing diagram of [Cu(acac)(phen)(ClO<sub>4</sub>)] (**4**) having two molecules in the unit cell.

**Figure S18.** The unit cell packing diagram of [Cu(acac)(dpq)(ClO<sub>4</sub>)] (**5**) having four molecules in the unit cell.

**Figure S19.** Absorption spectral traces of the complexes **1-6 (a-f)** in 5 mM Tris-HCl buffer (pH 7.2) on increasing the quantity of calf thymus DNA. The inset shows the least square fits of  $\Delta\epsilon_{af}/\Delta\epsilon_{bf}$  vs. [DNA] for the complexes using McGhee-von Hippel (MvH) method.

**Figure S20.** Emission spectral traces of HSA (2  $\mu$ M) in the presence of complexes **1-6 (a-f)**. The inset shows the plot of ( $I_0/I$ ) vs. [complex].

**Figure S21.** Fluorescence intensity decay profiles of HSA in the absence and presence of 10 and 20  $\mu$ M of complex **3** in phosphate buffer (pH 7.4).

**Figures S22-S25.** Cell viability plots showing the cytotoxic effect of complexes **1, 4-6** in HeLa and A549 cells in dark (black symbols) and in the presence of visible light (red symbols, 400-700 nm, 10 J cm<sup>-2</sup>, 1 h).

**Figure S26.** Uptake of the complexes **1-3** (10  $\mu$ M) at 37 °C for 4 h incubation time in HeLa cells determined by flow cytometry.

**Figure S27.** Annexin V-FITC-PI staining of HeLa cells undergoing apoptosis induced by complex **1** (5  $\mu$ M) in dark and visible light (400-700 nm, 10 J cm<sup>-2</sup>) analyzed by flow cytometry.

**Figure S28.** Annexin V-FITC-PI staining of HeLa cells undergoing apoptosis induced by complex **3** (5  $\mu$ M) in dark and visible light (400-700 nm, 10 J cm<sup>-2</sup>) analyzed by flow cytometry

**Table S1.** Selected bond distances (Å) and bond angles (°) of [Cu(acac)(phen)(ClO<sub>4</sub>)] (4)

---

|           |            |           |           |
|-----------|------------|-----------|-----------|
| Cu1-O1    | 1.8981(18) | O1-Cu1-N1 | 90.66(8)  |
| Cu1-O2    | 1.9083(19) | O2-Cu1-N1 | 172.53(8) |
| Cu1-O3    | 2.414(2)   | N2-Cu1-N1 | 82.41(8)  |
| Cu1-N1    | 2.008(2)   | O1-Cu1-O3 | 97.08(9)  |
| Cu1-N2    | 1.999(2)   | O2-Cu1-O3 | 89.15(8)  |
| O1-Cu1-O2 | 94.47(8)   | N2-Cu1-O3 | 90.57(8)  |
| O1-Cu1-N2 | 170.16(8)  | N1-Cu1-O3 | 95.61(8)  |
| O2-Cu1-N2 | 91.81(8)   |           |           |

---

**Table S2.** Selected bond distances (Å) and bond angles ( $^{\circ}$ ) of [Cu(acac)(dpq)(ClO<sub>4</sub>)] (**5**)

|           |            |           |            |
|-----------|------------|-----------|------------|
| Cu1-N1    | 2.005(3)   | O2-Cu1-N2 | 91.61(12)  |
| Cu1-N2    | 2.017(3)   | O1-Cu1-N2 | 168.73(13) |
| Cu1-O1    | 1.898(3)   | N1-Cu1-N2 | 81.84(12)  |
| Cu1-O2    | 1.895(3)   | O2-Cu1-O3 | 99.22(13)  |
| Cu1-O3    | 2.402(3)   | O1-Cu1-O3 | 100.22(12) |
| O2-Cu1-O1 | 94.76(11)  | N1-Cu1-O3 | 88.02(13)  |
| O2-Cu1-N1 | 170.08(12) | N2-Cu1-O3 | 87.90(11)  |
| O1-Cu1-N1 | 90.57(12)  |           |            |

**Table S3.** DNA and protein binding constants for the Complexes [Cu(Cur)(L)(ClO<sub>4</sub>)] (**1-3**) and [Cu(acac)(L)(ClO<sub>4</sub>)] (**4-6**) (L = phen, **1, 4**; dpq, **2, 5**; dppz, **3, 6**).

| Complex No. | Binding constant (M <sup>-1</sup> ) |                                |
|-------------|-------------------------------------|--------------------------------|
|             | <i>ct</i> -DNA                      | HSA                            |
| <b>1</b>    | 7.69 (±0.39) × 10 <sup>5</sup>      | 1.67 (±0.02) × 10 <sup>5</sup> |
| <b>2</b>    | 8.42 (±0.33) × 10 <sup>5</sup>      | 3.11 (±0.03) × 10 <sup>5</sup> |
| <b>3</b>    | 9.85 (±0.50) × 10 <sup>5</sup>      | 3.20 (±0.02) × 10 <sup>5</sup> |
| <b>4</b>    | 3.18 (±0.19) × 10 <sup>5</sup>      | 1.16 (±0.01) × 10 <sup>5</sup> |
| <b>5</b>    | 5.96 (±0.54) × 10 <sup>5</sup>      | 1.73 (±0.03) × 10 <sup>5</sup> |
| <b>6</b>    | 8.73 (±0.43) × 10 <sup>5</sup>      | 2.95 (±0.02) × 10 <sup>5</sup> |

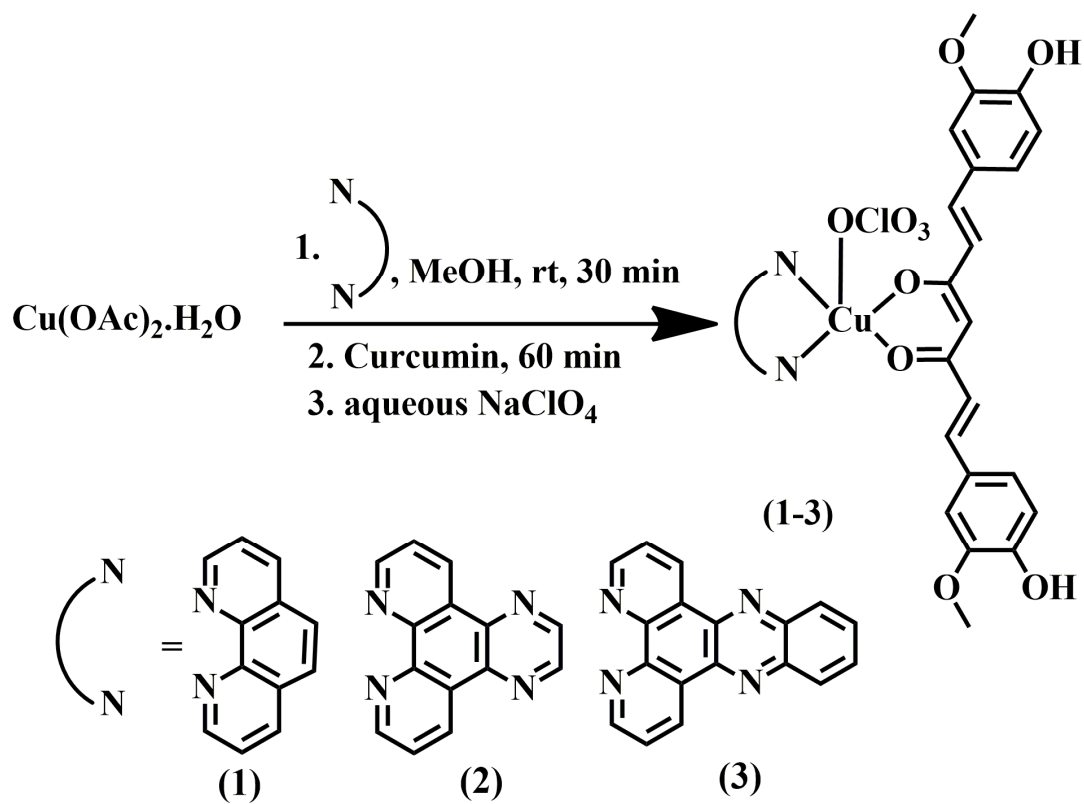

**Scheme S1.** Synthetic scheme for the complexes 1-3.

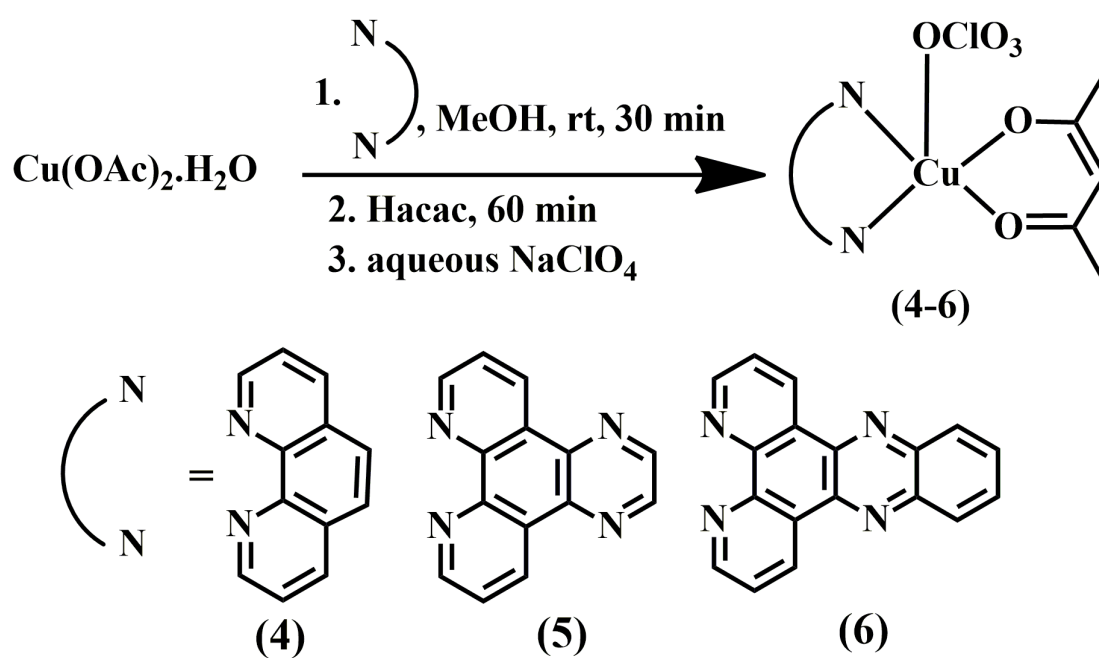

**Scheme S2.** Synthetic scheme for the complexes 4-6.



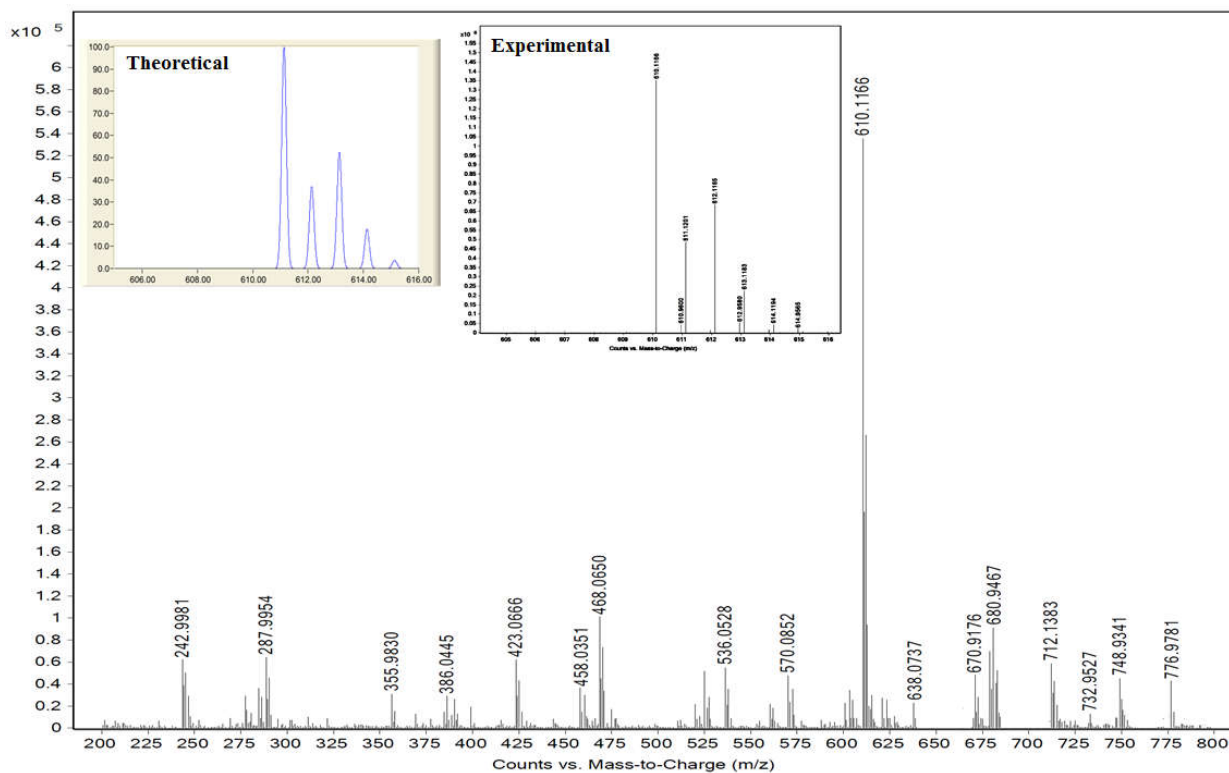

**Figure S1.** ESI-MS spectrum of complex **1** in methanol showing the  $[M-(ClO_4)]^+$  peak at  $m/z = 610.1166$ . The inset shows the theoretical and experimental isotopic distributions for the complex.

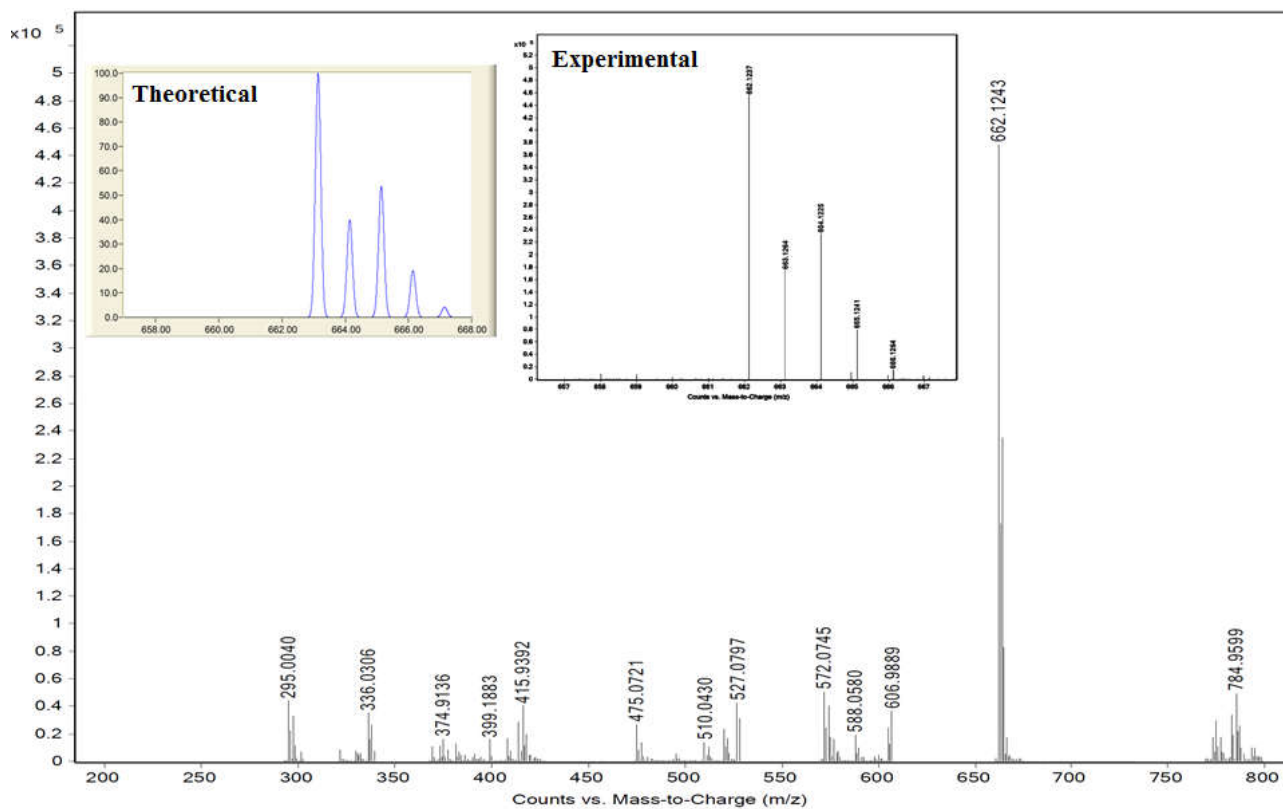

**Figure S2.** ESI-MS spectrum of complex **2** in methanol showing the  $[M-(ClO_4)]^+$  peak at  $m/z = 662.1243$ . The inset shows the theoretical and experimental isotopic distributions for the complex.

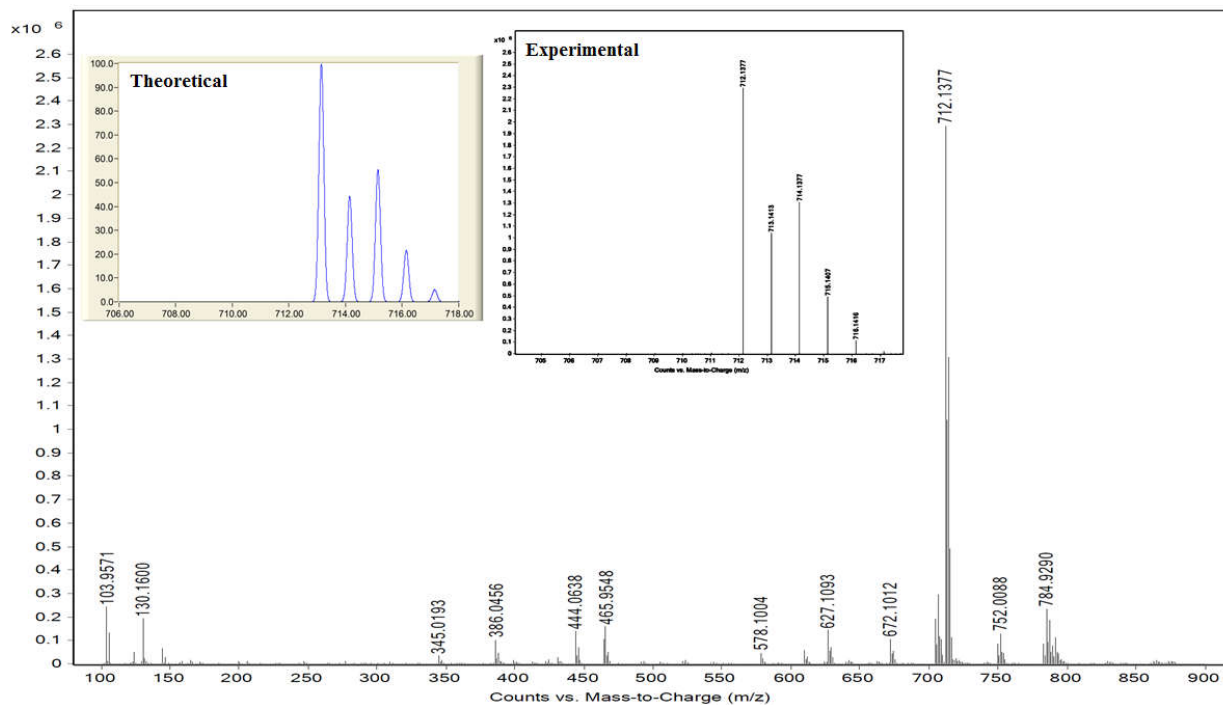

**Figure S3.** ESI-MS spectrum of complex **3** in methanol showing the  $[M-(ClO_4)]^+$  peak at  $m/z = 712.1377$ . The inset shows the theoretical and experimental isotopic distributions for the complex.

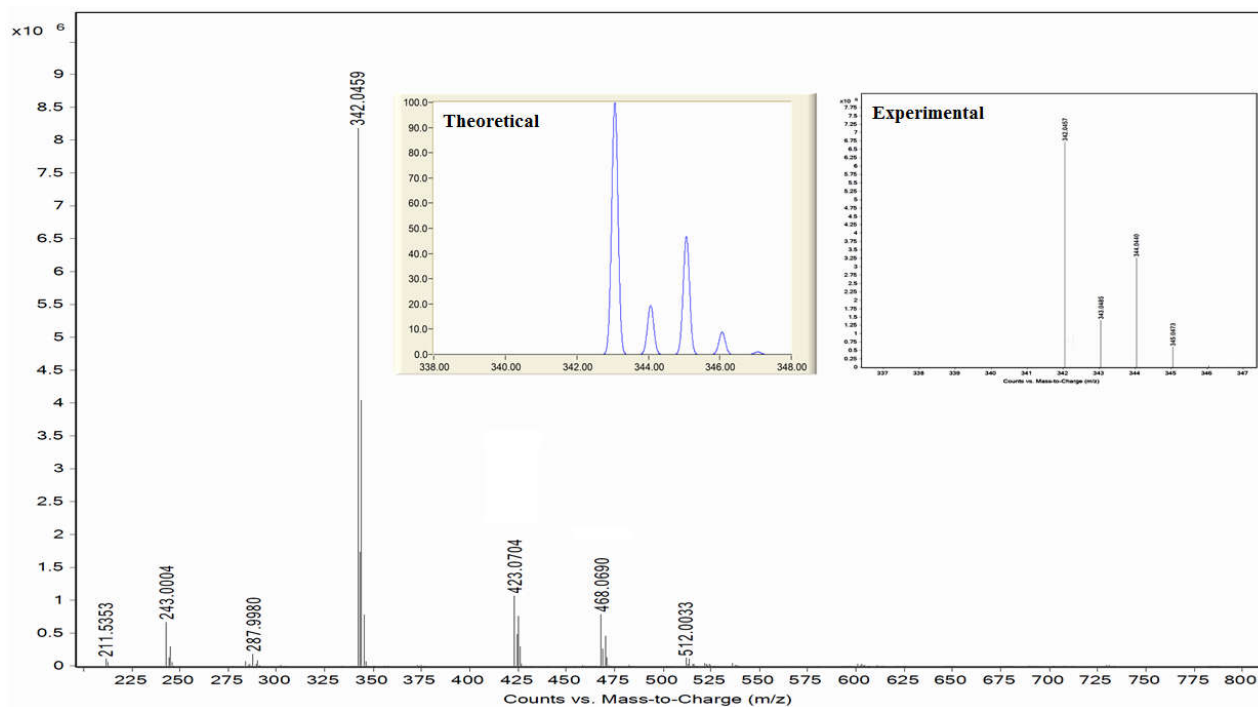

**Figure S4.** ESI-MS spectrum of complex **4** in methanol showing the  $[M-(ClO_4)]^+$  peak at  $m/z = 342.0459$ . The inset shows the theoretical and experimental isotopic distributions for the complex

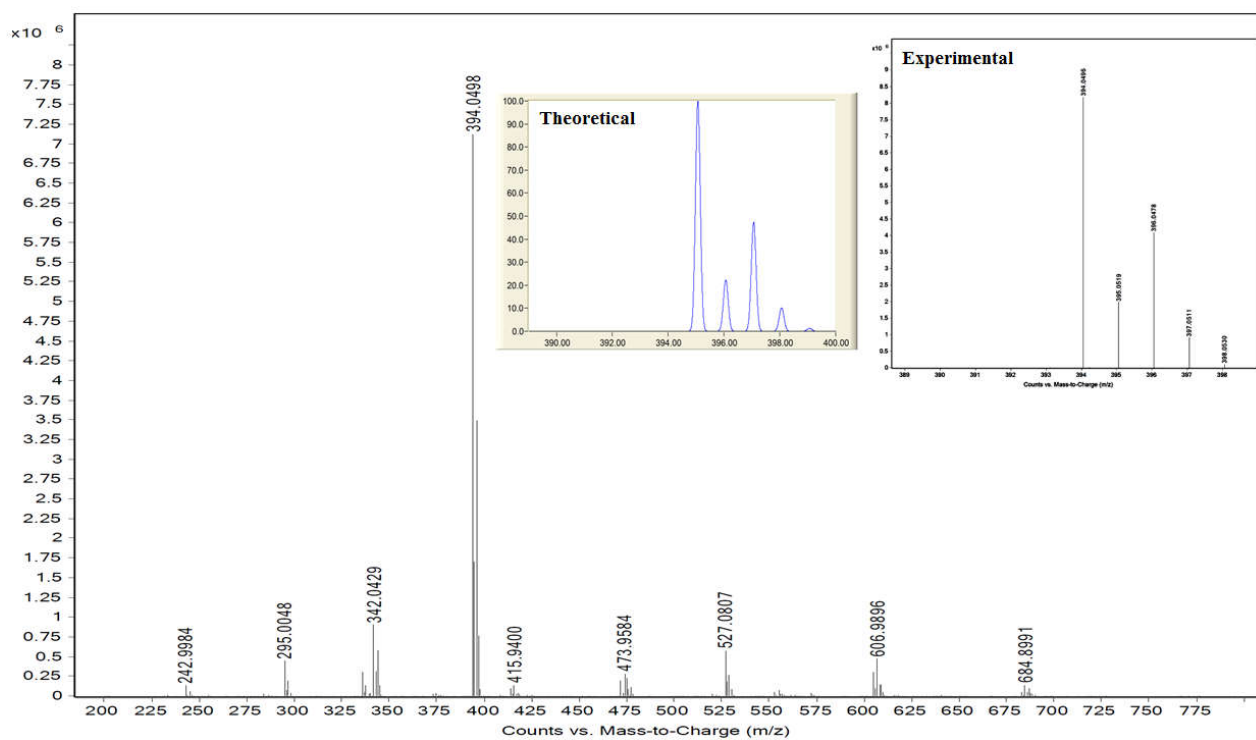

**Figure S5.** ESI-MS spectrum of complex **5** in methanol showing the  $[M-(ClO_4)]^+$  peak at  $m/z = 394.0498$ . The inset shows the theoretical and experimental isotopic distributions for the complex.

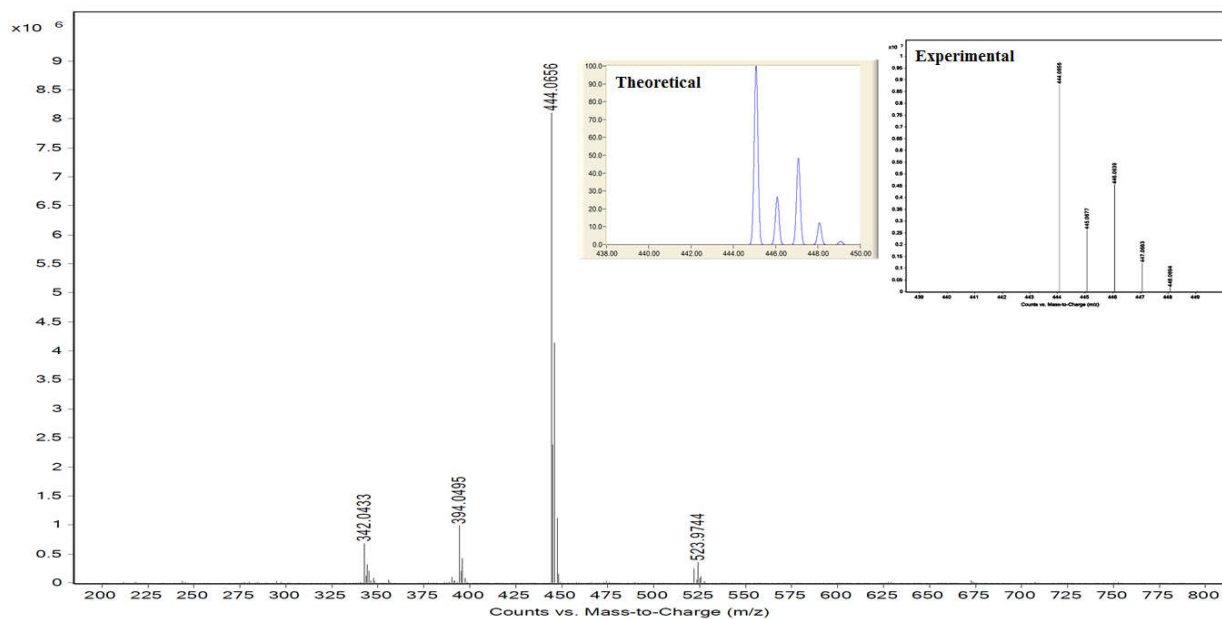

**Figure S6.** ESI-MS spectrum of complex **6** in methanol showing the  $[M-(ClO_4)]^+$  peak at  $m/z = 444.0656$ . The inset shows the theoretical and experimental isotopic distributions for the complex.

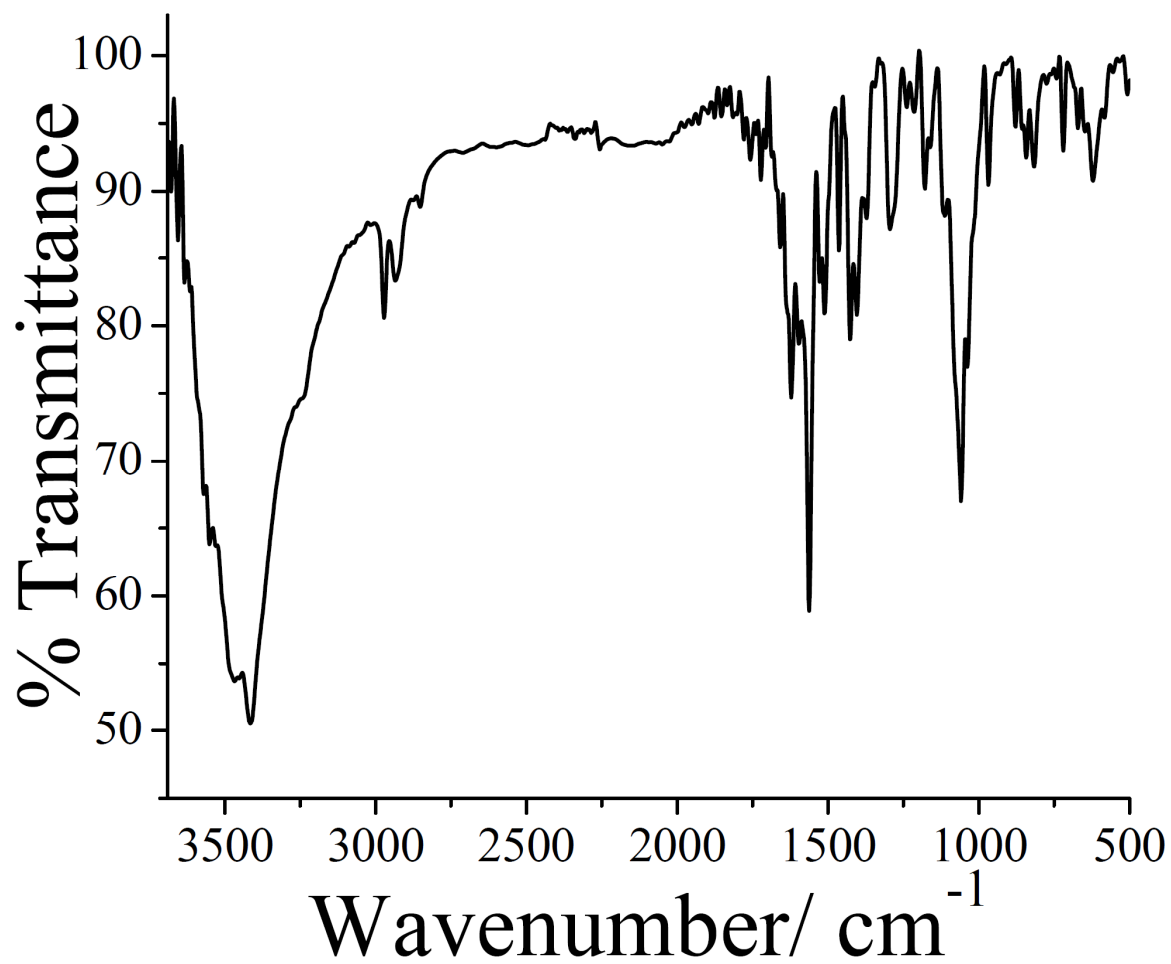

**Figure S7.** IR spectrum of complex 1.

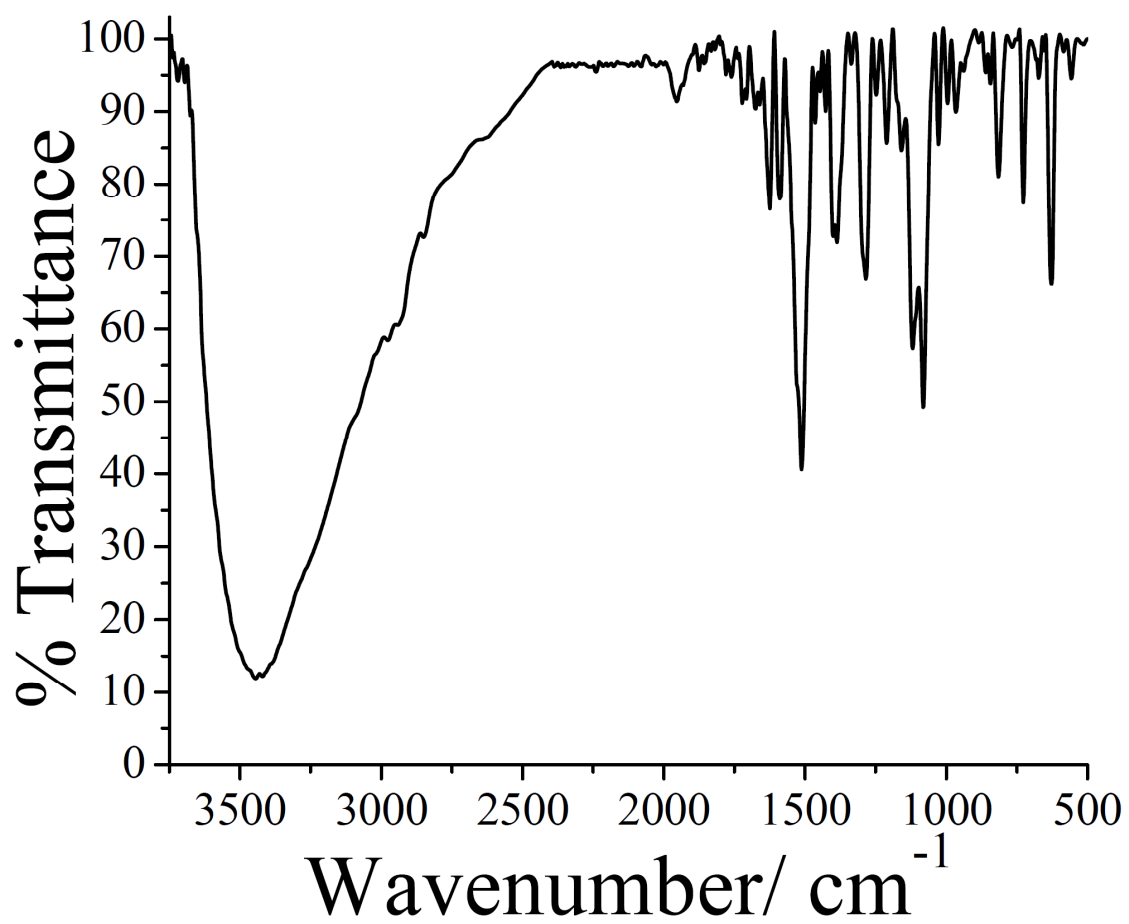

**Figure S8.** IR spectrum of complex 2.



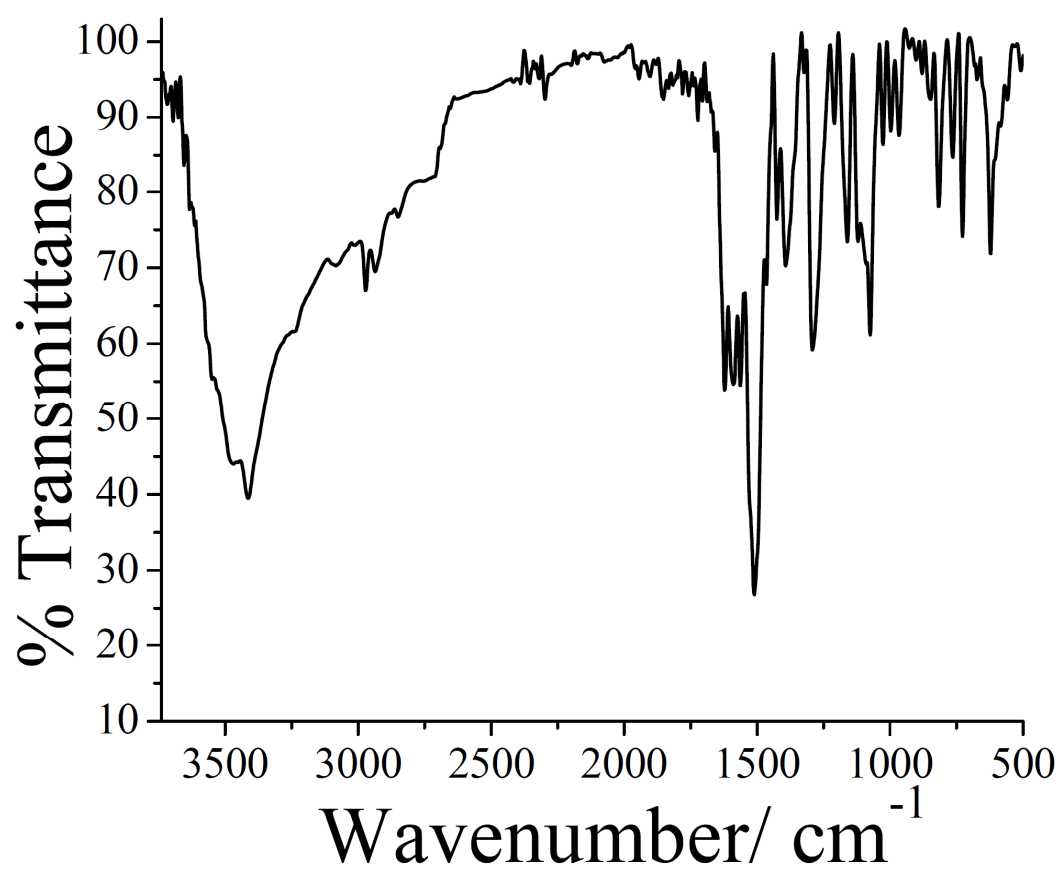

**Figure S9.** IR spectrum of complex **3**.

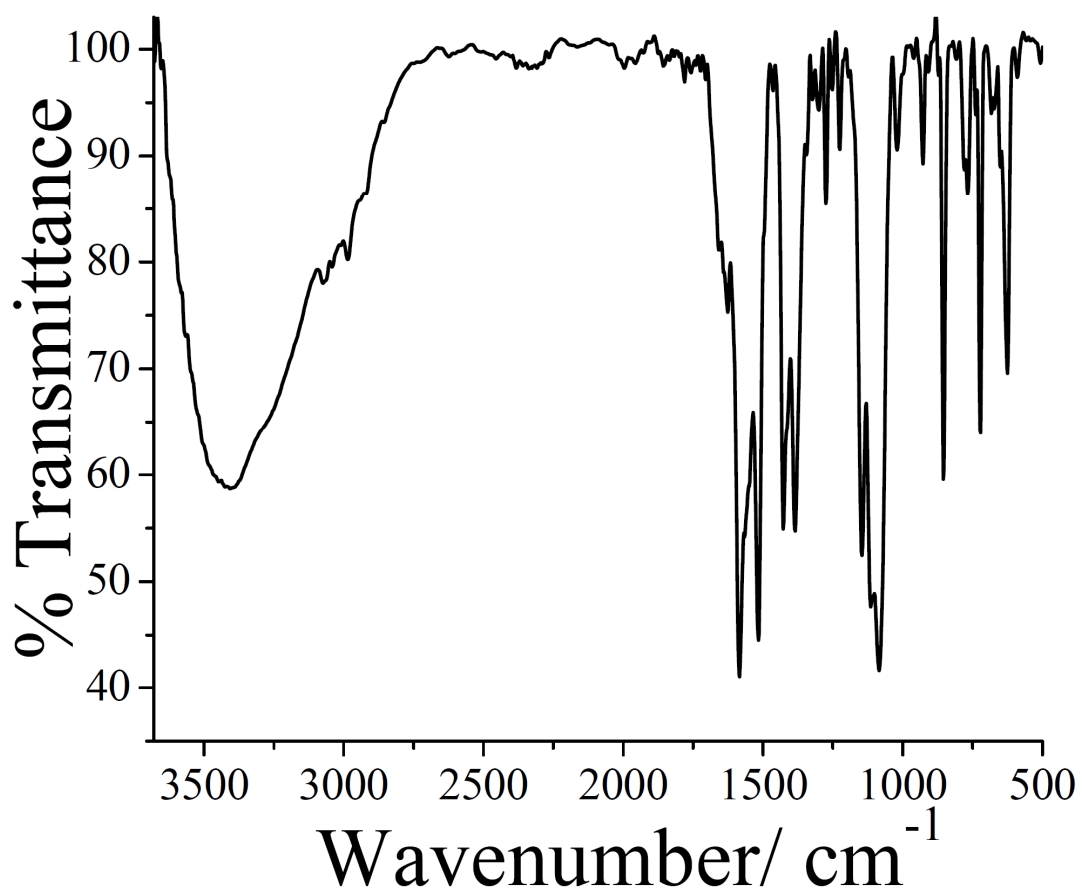

**Figure S10.** IR spectrum of complex 4.

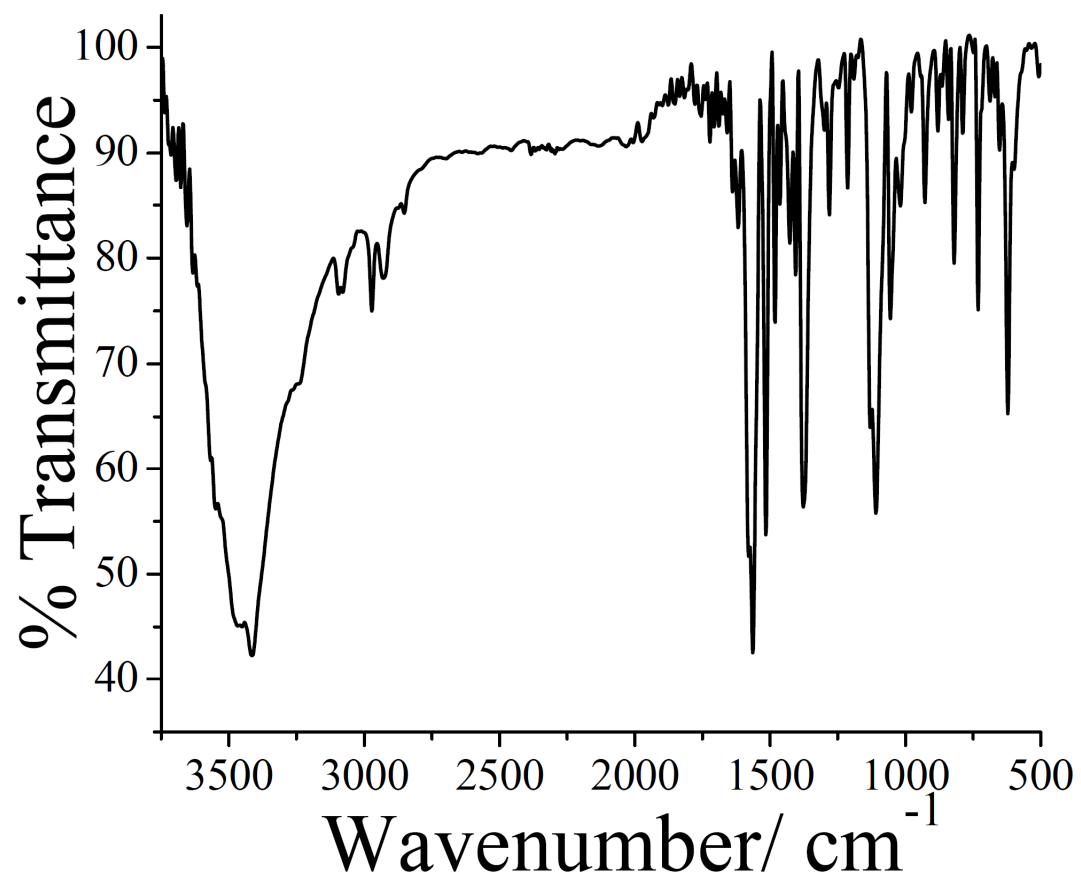

Figure S11. IR spectrum of complex 5.

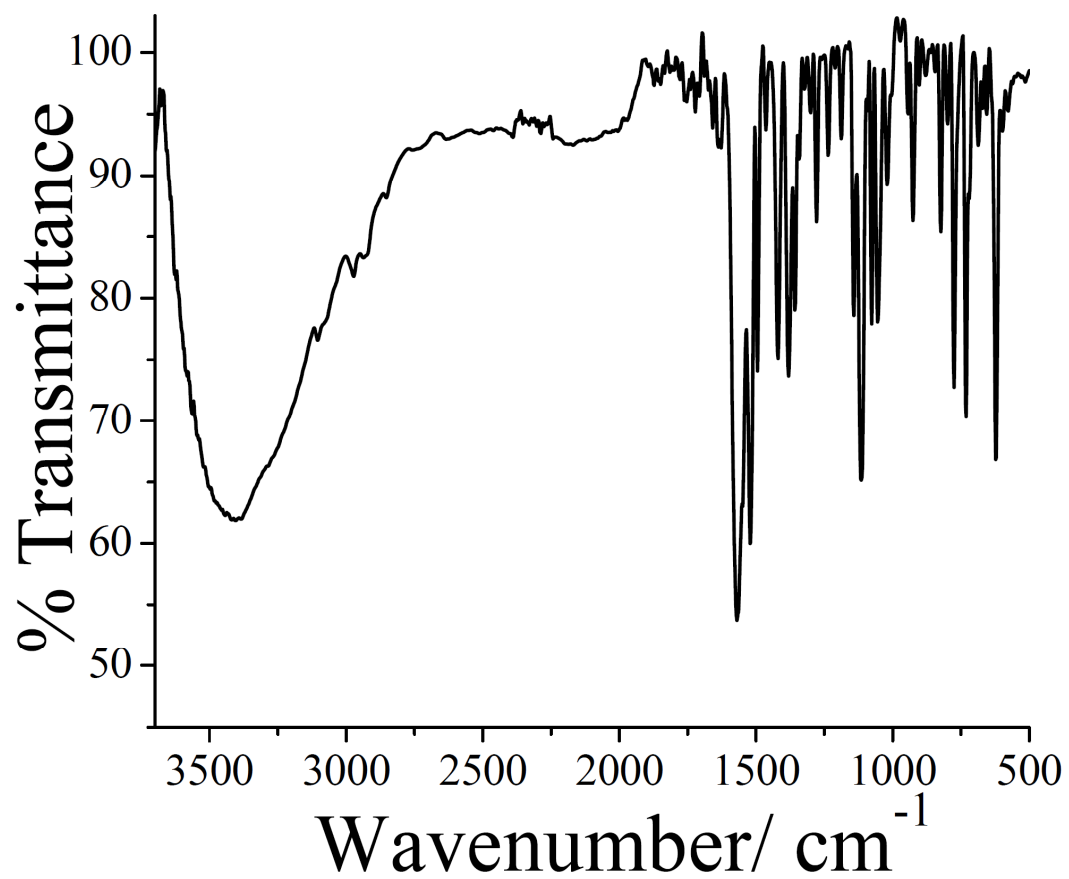

**Figure S12.** IR spectrum of complex 6.

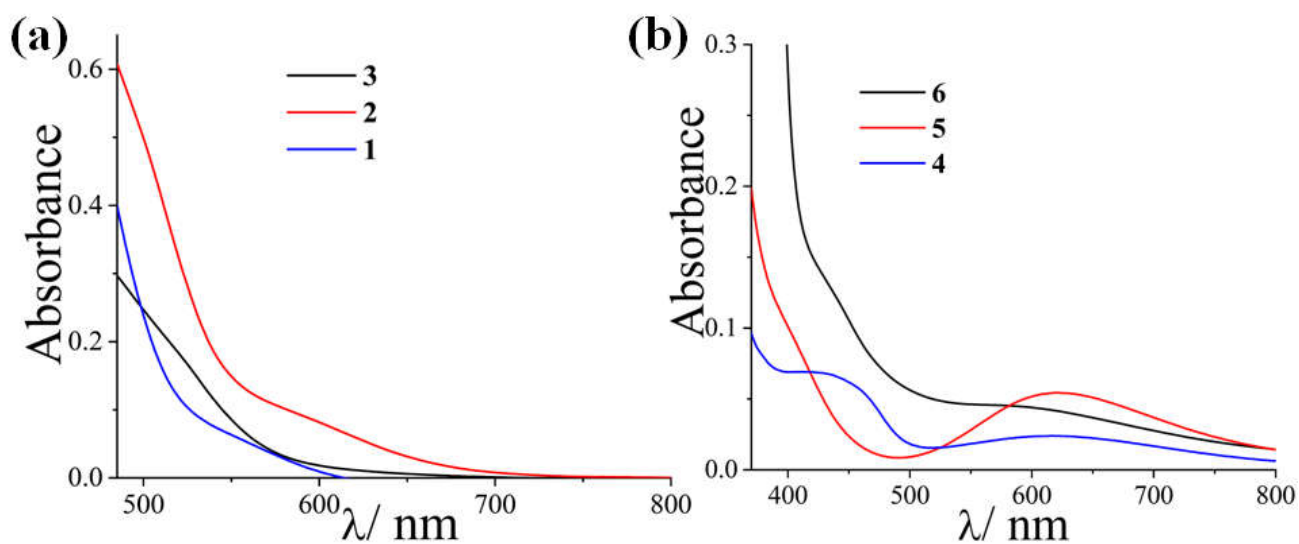

**Figure S13.** The electronic spectra of the complexes **1-3** (a) and **4-6** (b) (1 mM) in DMF-Tris-HCl buffer (pH 7.2) (1:4 v/v).

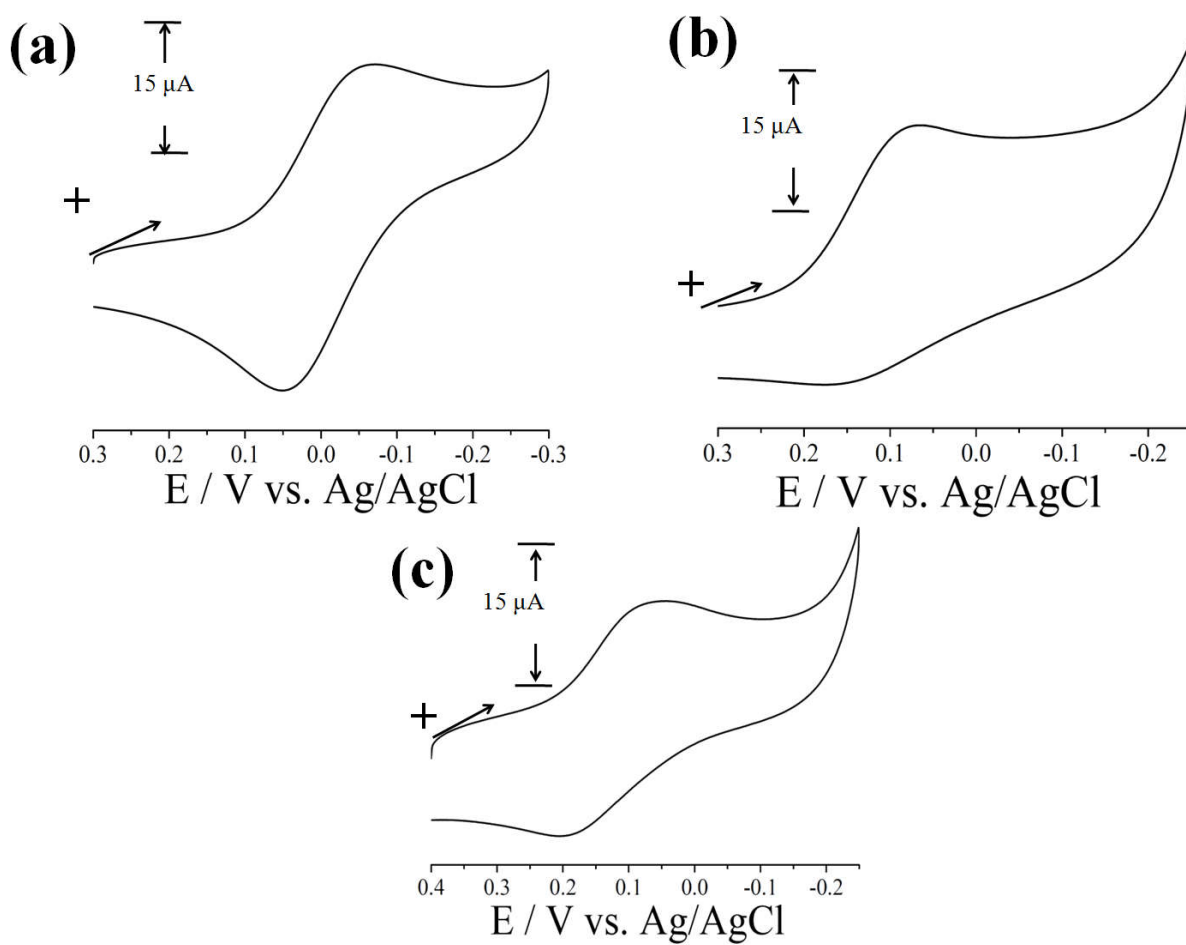

**Figure S14.** Cyclic voltammograms of complexes 4-6 in DMF using TBAP (0.1 M) as the supporting electrolyte with a scan rate of  $50 \text{ mV s}^{-1}$ .

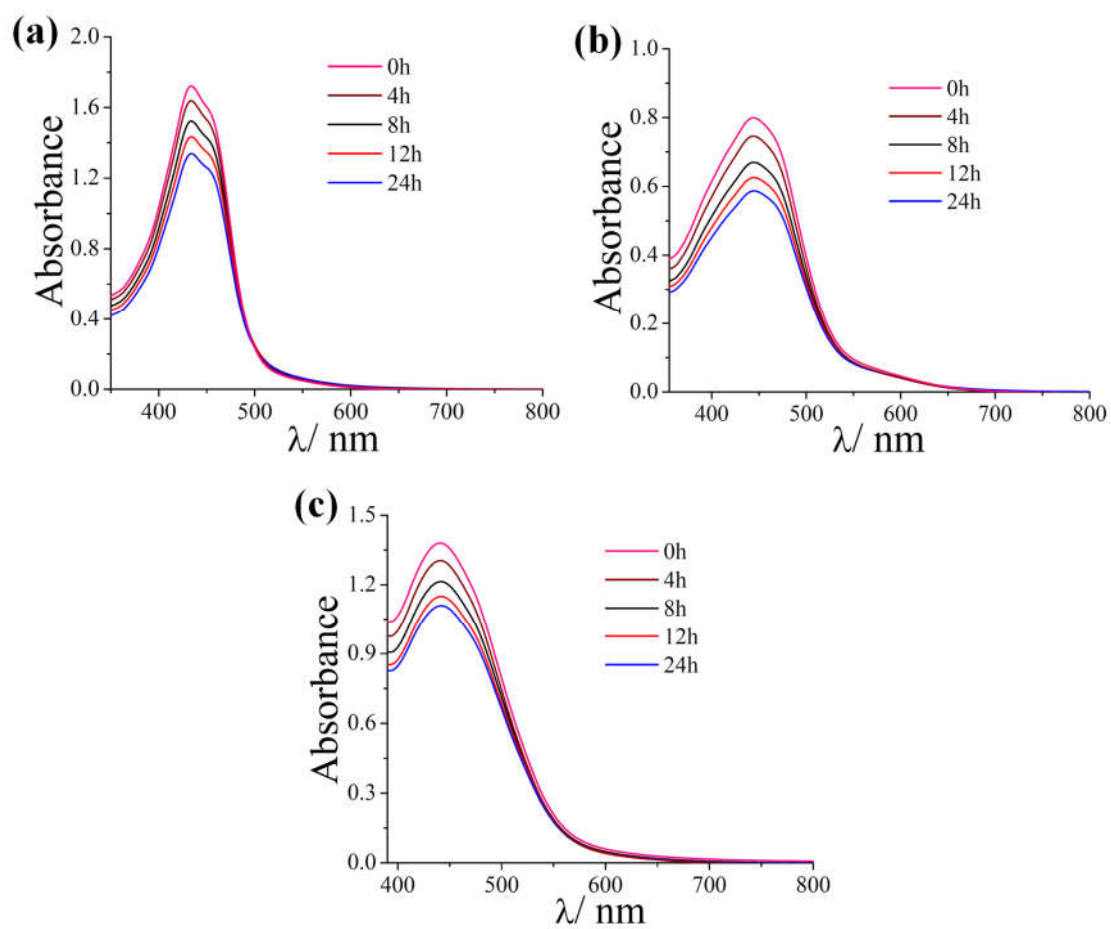

**Figure S15.** Electronic absorption spectra of the complexes **1-3** (a-c) in DMSO-Tris-HCl buffer (pH 7.2) (1:4 v/v) at different time points showing the solution phase stability of the complexes.

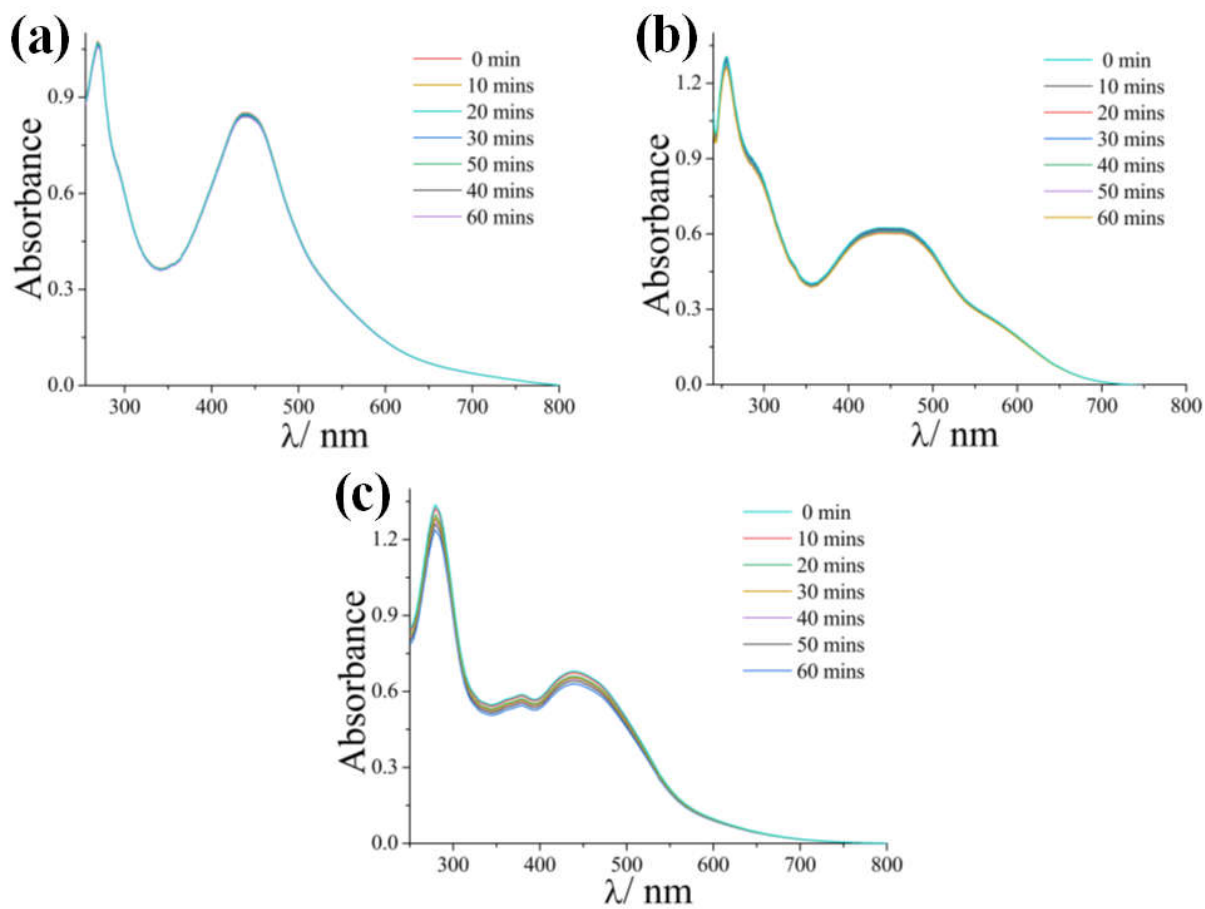

**Figure S16.** Electronic absorption spectra of the complexes **1** (a), **2** (b) and **3** (c) in DMSO-Tris-HCl buffer (pH 7.2) (1:4 v/v) at different time points of exposure to visible light (400-700 nm).



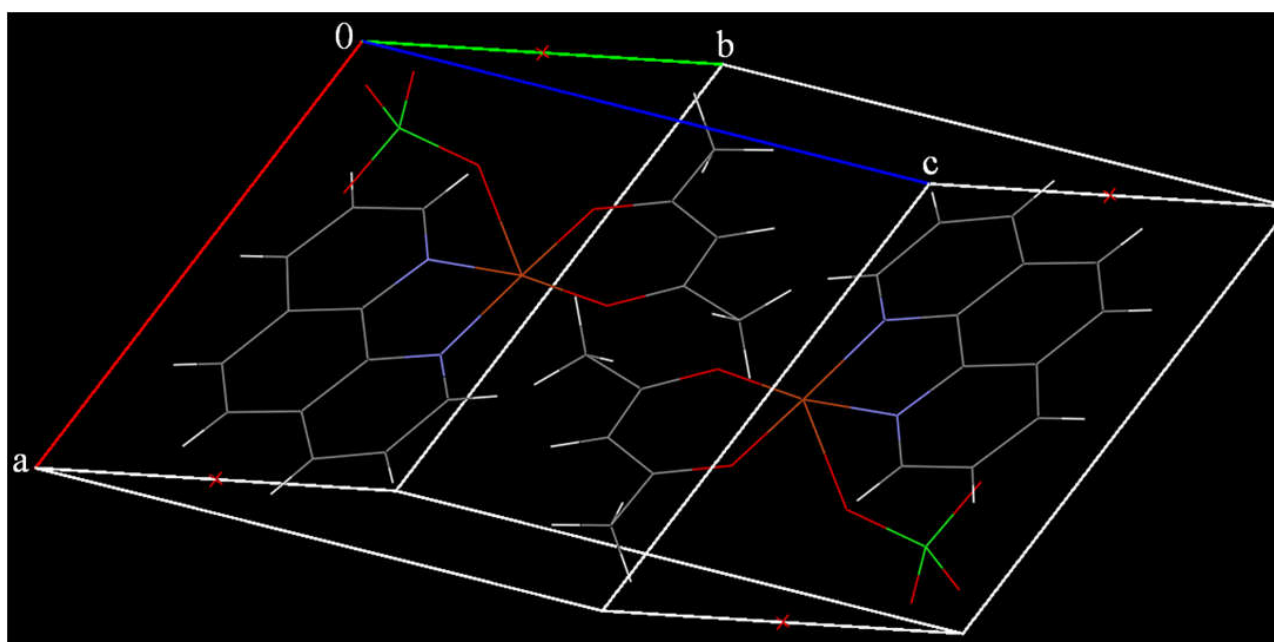

**Figure S17.** The unit cell packing diagram of  $[\text{Cu}(\text{acac})(\text{phen})(\text{ClO}_4)]$  (**4**) having two molecules in the unit cell.

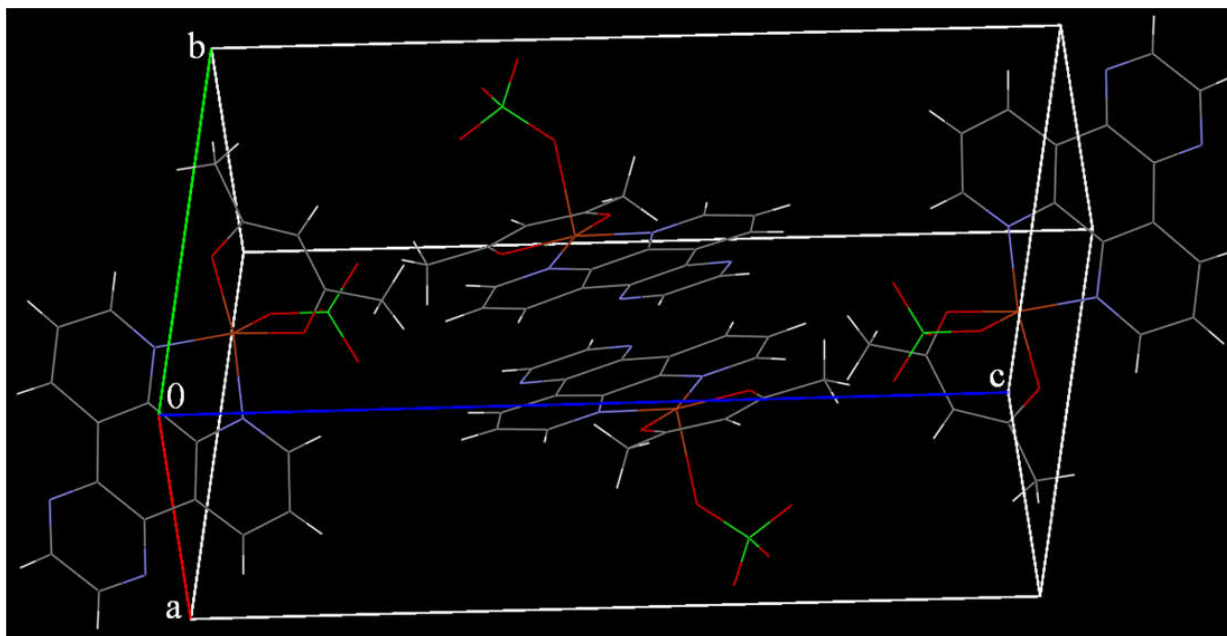

**Figure S18.** The unit cell packing diagram of  $[\text{Cu}(\text{acac})(\text{dpq})(\text{ClO}_4)]$  (**5**) having four molecules in the unit cell.

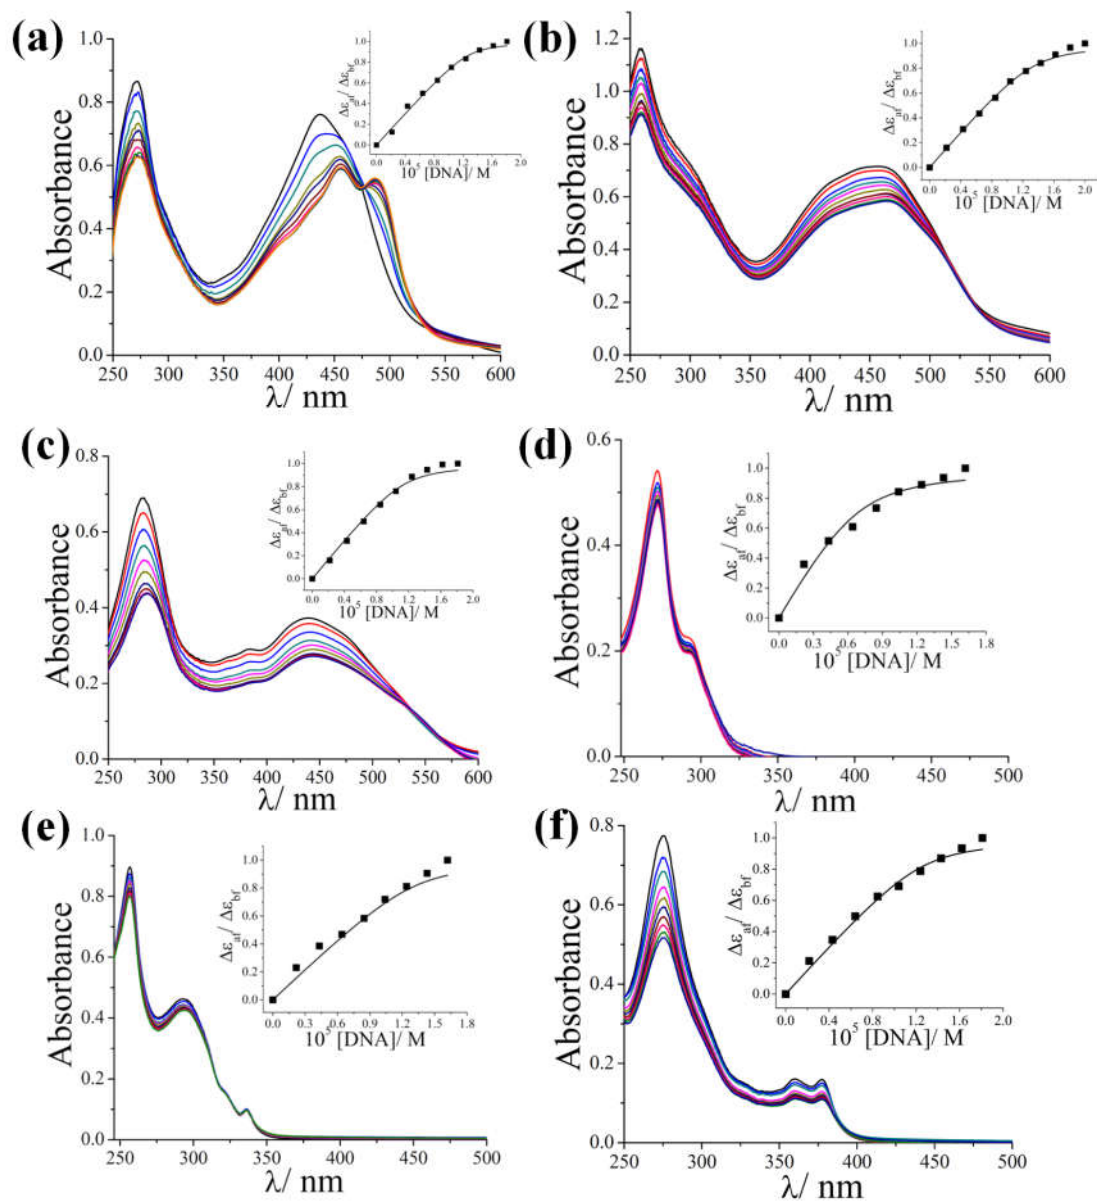

**Figure S19.** Absorption spectral traces of the complexes **1-6** (a-f) in 5 mM Tris-HCl buffer (pH 7.2) on increasing the quantity of calf thymus DNA. The inset shows the least square fits of  $\Delta\varepsilon_{af}/\Delta\varepsilon_{bf}$  vs. [DNA] for the complexes using McGhee-von Hippel (MvH) method.

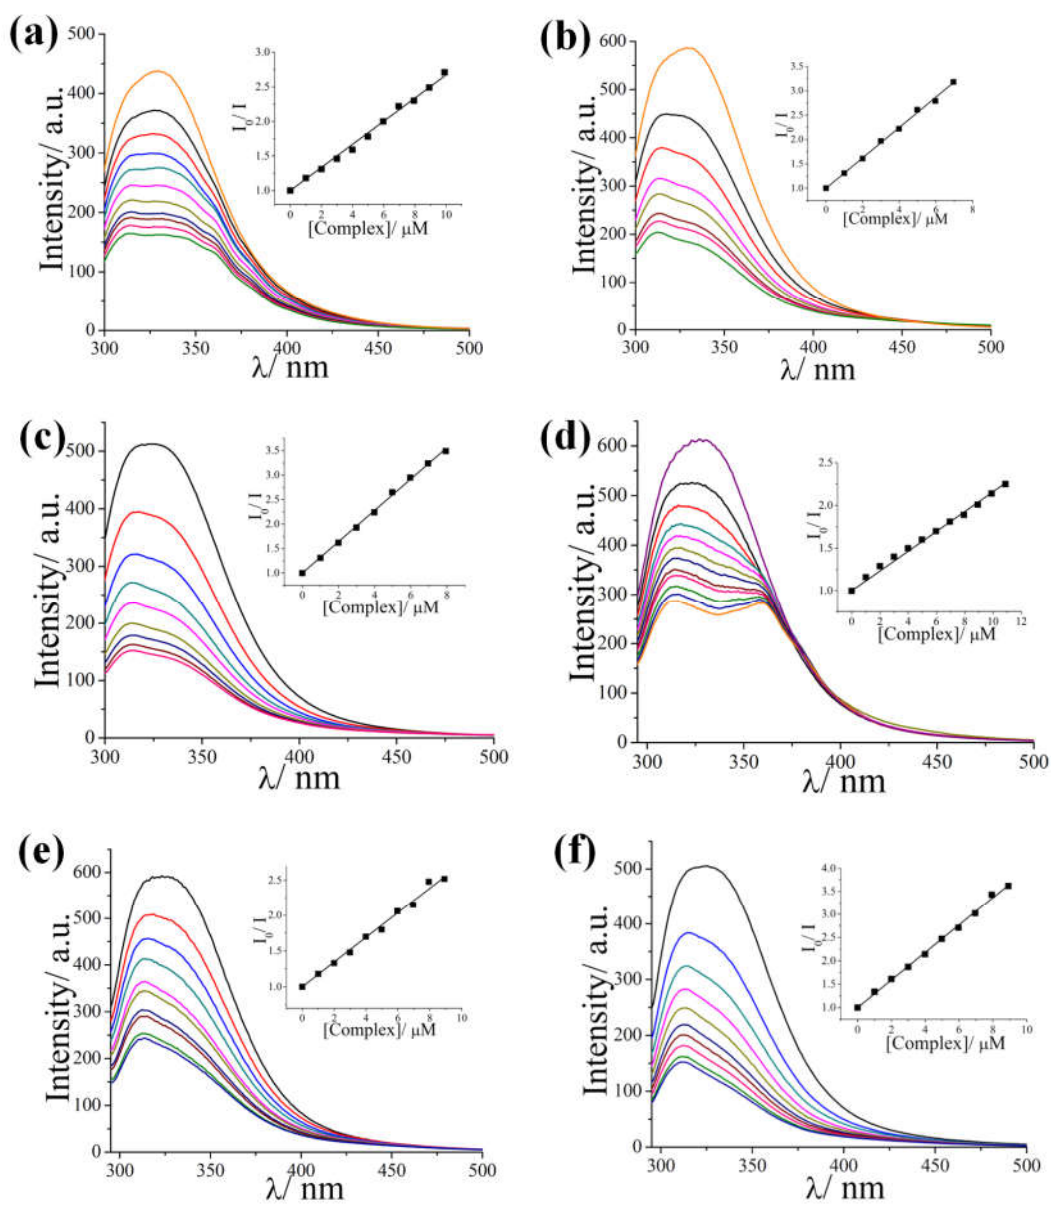

**Figure S20.** Emission spectral traces of HSA (2  $\mu\text{M}$ ) in the presence of complexes 1-6 (a-f). The inset shows the plot of  $(I_0/I)$  vs. [complex].

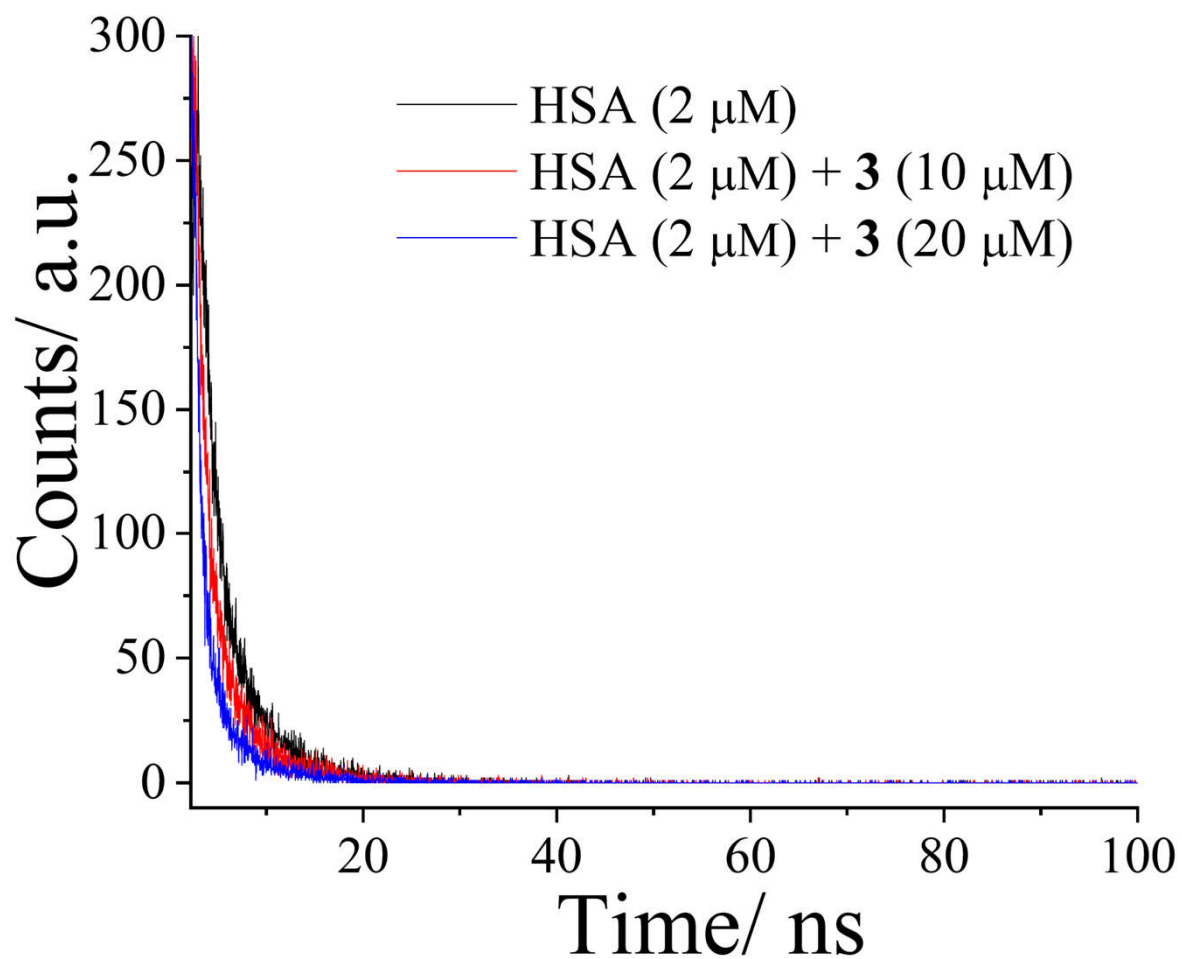

**Figure S21.** Fluorescence intensity decay profiles of HSA in the absence and presence of 10 and 20  $\mu\text{M}$  of complex **3** in phosphate buffer (pH 7.4).

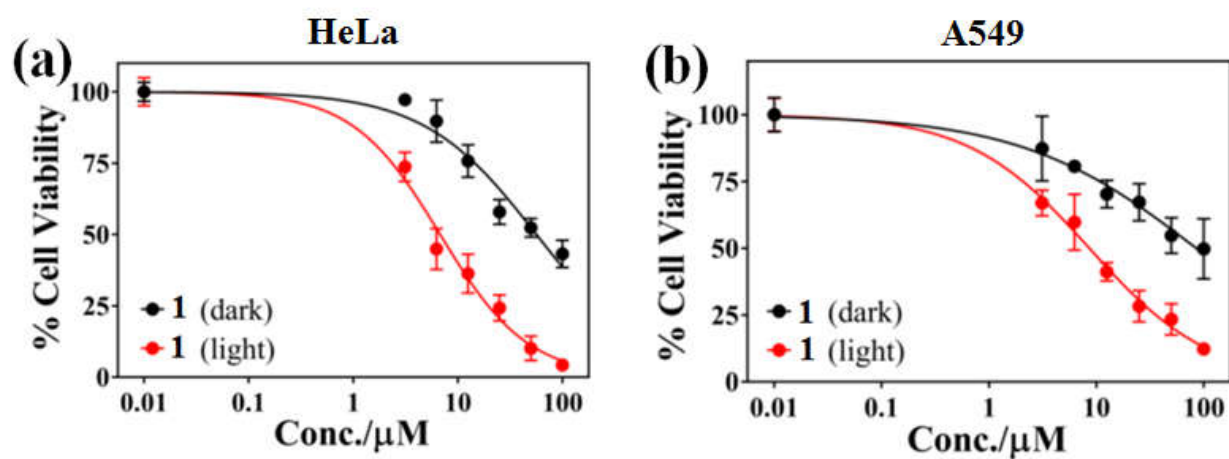

**Figure S22.** Cell viability plots showing the cytotoxic effect of complex **1** in HeLa (a) and A549 (b) cells in dark (black symbols) and in the presence of visible light (red symbols, 400-700 nm,  $10 \text{ J cm}^{-2}$ , 1 h).

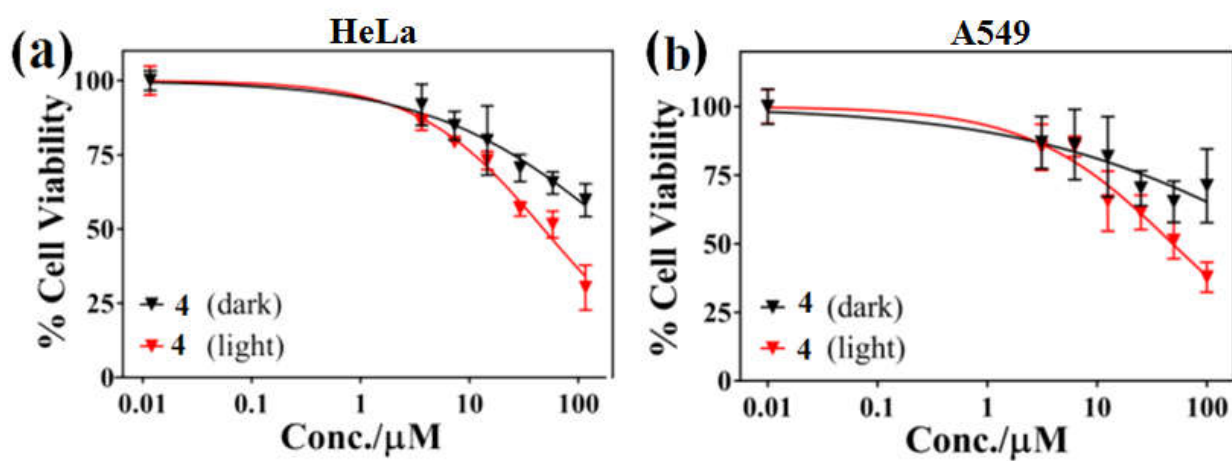

**Figure S23.** Cell viability plots showing the cytotoxic effect of complex **4** in HeLa (a) and A549 (b) cells in dark (black symbols) and in the presence of visible light (red symbols, 400-700 nm,  $10 \text{ J cm}^{-2}$ , 1 h).

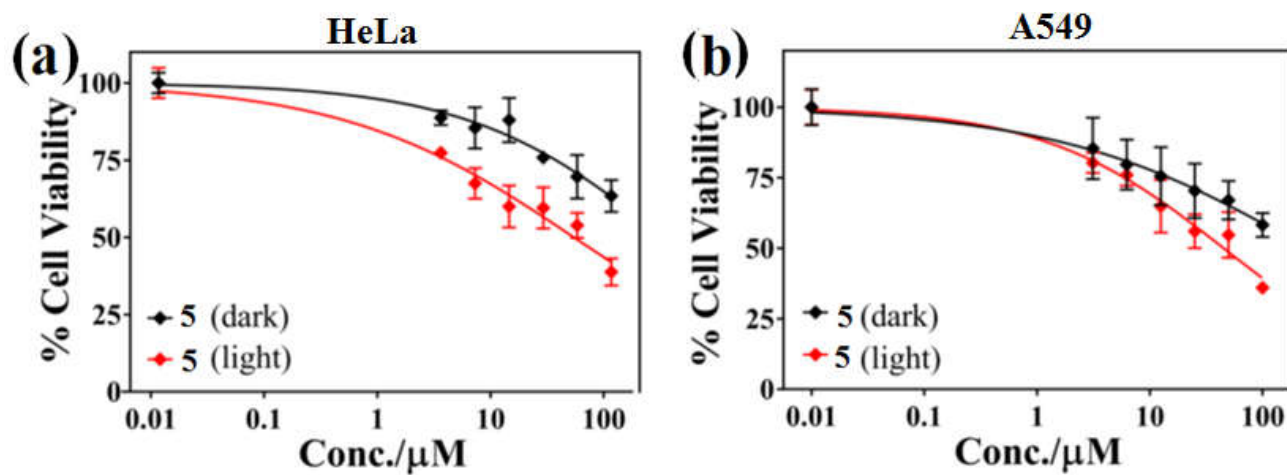

**Figure S24.** Cell viability plots showing the cytotoxic effect of complex 5 in HeLa (a) and A549 (b) cells in dark (black symbols) and in the presence of visible light (red symbols, 400-700 nm,  $10 \text{ J cm}^{-2}$ , 1 h).



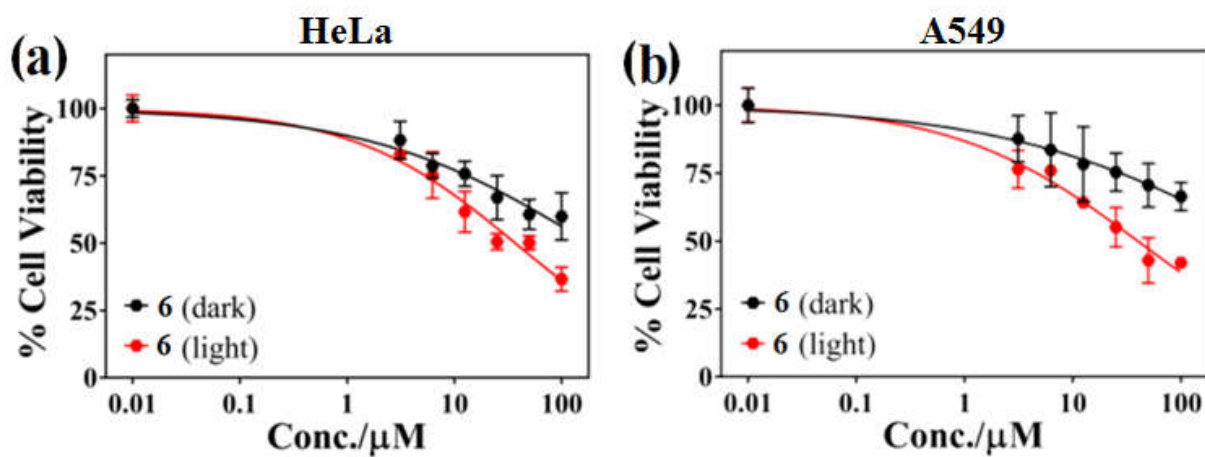

**Figure S25.** Cell viability plots showing the cytotoxic effect of complex **6** in HeLa (a) and A549 (b) cells in dark (black symbols) and in the presence of visible light (red symbols, 400-700 nm, 10 J cm<sup>-2</sup>, 1 h).

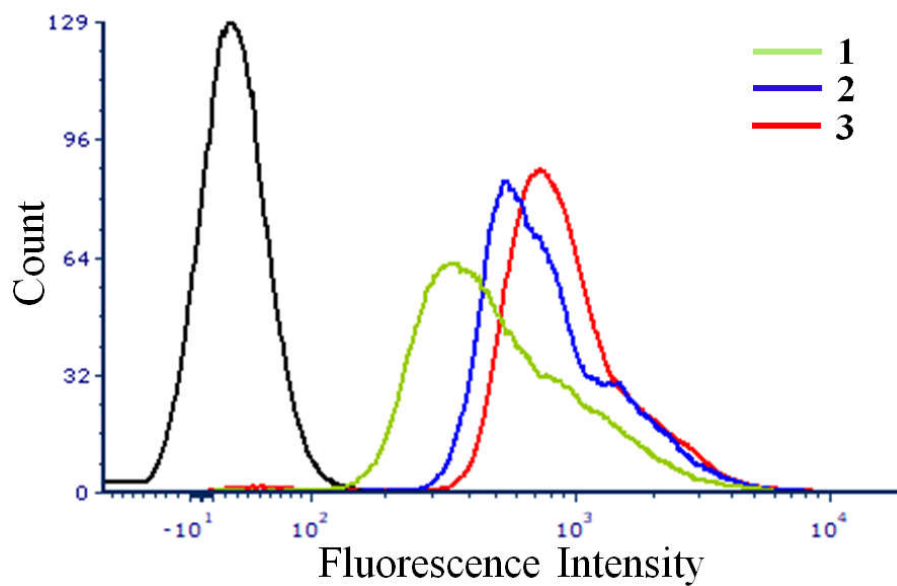

**Figure S26.** Uptake of the complexes **1-3** (10  $\mu$ M) at 37  $^{\circ}$ C for 4 h incubation time in HeLa cells determined by flow cytometry. The black line indicates cells' auto fluorescence.

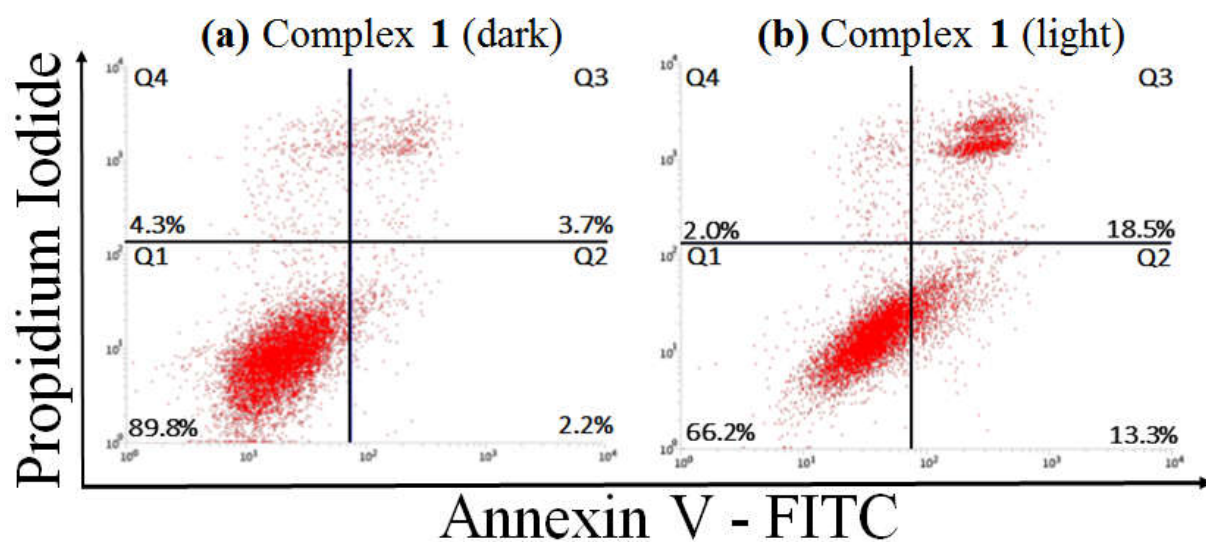

**Figure S27.** Annexin V-FITC-PI staining of HeLa cells undergoing apoptosis induced by complex 1 (5  $\mu$ M) in dark and visible light (400-700 nm, 10 J cm<sup>-2</sup>) analyzed by flow cytometry.

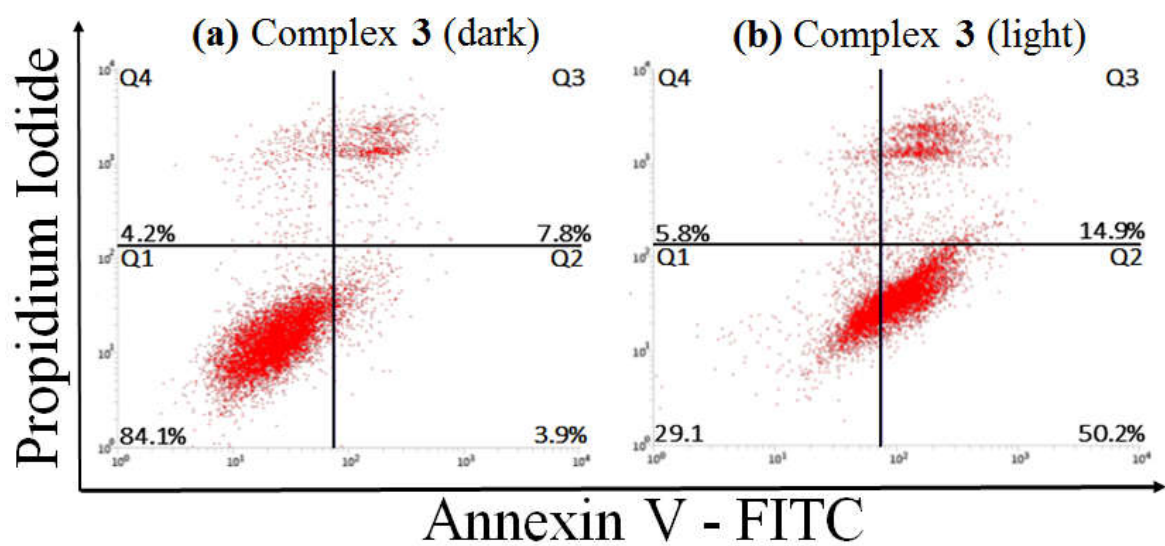

**Figure S28.** Annexin V-FITC-PI staining of HeLa cells undergoing apoptosis induced by complex 3 (5  $\mu$ M) in dark and visible light (400-700 nm, 10 J cm<sup>-2</sup>) analyzed by flow cytometry.
